# Supplementary material for: miRNA expression patterns in normal breast tissue and invasive breast cancers of BRCA1 and BRCA2 germ-line mutation carriers
Source: PubMed Central journal article supplement (PMC4741663; doi:10.18632/oncotarget.5617), 2015-09-11
Supplement: oncotarget-06-32115-s001.pdf [file oncotarget-06-32115-s001.pdf]

# **miRNA expression patterns in normal breast tissue and invasive breast cancers of BRCA1 and BRCA2 germ-line mutation carriers**

## **Supplementary Material**

### **OVERVIEW SUPPLEMENTARY DATA**

|             |                                                                                      |
|-------------|--------------------------------------------------------------------------------------|
| Methods.    | Characterization of patient samples and details of miRNA microarray analysis         |
| Table SI.   | Differentially expressed miRNAs between HER2 positive and negative breast carcinomas |
| Table SII.  | Pathway analysis - detailed DIANA-mirPath results (see separate file)                |
| Table SIII. | Target gene analysis - detailed IPA results (see separate file)                      |

The following files can be supplied upon request:

1. Raw data files miRNA microarray (non-normalized)
2. Processed data files miRNA microarray (normalized) that formed the basis of this research

## **SUPPLEMENTARY METHODS**

### *Characterization of patient samples*

From the paraffin tissue blocks, sections (4 µm thick) were cut and stained with haematoxylin and eosin for histopathology. Immunohistochemistry was performed to determine the ER, PR and HER2 status as part of routine pathology to guide clinical decisions concerning adjuvant therapy. For ER, a rabbit monoclonal anti-human antibody was used (1:100, pre-treatment with EDTA buffer) (DAKO, Cambridge, UK). For PR, a rabbit polyclonal anti-human antibody was used (1:100, pre-treatment with citrate buffer) (DAKO). For HER2, a mouse monoclonal anti-human antibody was used (1:100, pre-treatment with EDTA buffer) (Neomarkers, Kalamazoo, Massachusetts, USA). The slides were reviewed and scored by a single experienced breast pathologist (PJvD).

### *Details of miRNA microarray analysis*

At first, RNA analysis was performed to determine total RNA and miRNA concentrations and the 28S and 18S ribosomal RNA bands, using the 2100 Bioanalyzer and software (Agilent, Santa Clara, CA, USA). 150 ng of total RNA was dephosphorylated using 11.2 units of calf intestine alkaline phosphatase (30 min at 37°C), followed by end-labeling with pCp-Cy3 and 15 units of T4 RNA ligase (2 hours at 16°C), using the miRNA Complete Labeling and Hyb Kit (Agilent Technologies). Labeled samples were then purified using Micro Bio-Spin 6 columns (Bio-Rad, Hercules, CA, USA). Measurements of labeling efficiency and nucleic acid concentration were performed using Nanodrop ND-1000 spectrophotometer. 10x blocking agent and 2x Hi-RPM hybridization buffer were added to the samples (Agilent Technologies). Hybridization was carried out for 20 hours at 55°C with rotation at 20 rpm in a designated Agilent G2545A hybridization

oven. Afterwards, microarrays were washed and scanned using an Agilent scanner with Agilent Scan Control 7.0 software. Probe level data were extracted by the Agilent Feature Extraction Software v9.5.3.1 for miRNA microarray (Agilent Technologies). For each array, a Feature Extraction file (containing signal intensities from all individual probes), a GeneView file (containing summarized signal intensities for each miRNA by combining replicate probe intensities), and a quality control report were generated. Feature extraction files were imported into GeneSpring GX v12.5 software (Agilent Technologies) for analysis.

**Table S1. Differentially expressed miRNAs between HER2 positive and negative breast carcinomas**

| miRNA                 | FDR      | FC       |
|-----------------------|----------|----------|
| <b>Up-regulated</b>   |          |          |
| hsa-miR-1225-3p       | 0.002578 | 1.356661 |
| hsa-miR-1225-5p       | 0.049636 | 1.252916 |
| hsa-miR-1234-5p       | 0.047666 | 1.233338 |
| hsa-miR-1268b         | 0.049636 | 1.288895 |
| hsa-miR-1273f         | 0.011607 | 1.276324 |
| hsa-miR-1275          | 0.033476 | 1.192103 |
| hsa-miR-134           | 0.016774 | 1.390645 |
| hsa-miR-150-3p        | 0.002116 | 1.296638 |
| hsa-miR-1587          | 0.016009 | 1.448497 |
| hsa-miR-187-5p        | 0.005653 | 1.435179 |
| hsa-miR-2392          | 0.047346 | 1.351058 |
| hsa-miR-3141          | 0.016009 | 1.187987 |
| hsa-miR-345-3p        | 0.047346 | 1.43803  |
| hsa-miR-3659          | 0.032904 | 1.224634 |
| hsa-miR-371a-5p       | 0.026413 | 1.385174 |
| hsa-miR-3937          | 0.035898 | 1.306349 |
| hsa-miR-3960          | 0.043308 | 1.313168 |
| hsa-miR-4253          | 0.009594 | 1.34886  |
| hsa-miR-4314          | 0.032904 | 1.253843 |
| hsa-miR-4327          | 0.039993 | 1.40093  |
| hsa-miR-4417          | 0.004928 | 1.42873  |
| hsa-miR-4463          | 0.016009 | 1.306708 |
| hsa-miR-4486          | 0.002116 | 1.464665 |
| hsa-miR-4534          | 0.041282 | 1.221951 |
| hsa-miR-4655-5p       | 0.005653 | 1.315056 |
| hsa-miR-4689          | 0.001457 | 1.457825 |
| hsa-miR-4701-3p       | 0.015116 | 1.459531 |
| hsa-miR-4738-3p       | 0.016009 | 1.288022 |
| hsa-miR-4758-5p       | 0.03821  | 1.357123 |
| hsa-miR-5003-3p       | 0.049636 | 1.459127 |
| hsa-miR-5090          | 0.002116 | 1.214843 |
| hsa-miR-5787          | 0.007037 | 1.325038 |
| hsa-miR-601           | 0.032904 | 1.321849 |
| hsa-miR-6089          | 0.018909 | 1.219043 |
| hsa-miR-6511a-5p      | 0.015116 | 1.317875 |
| hsa-miR-6511b-5p      | 0.026413 | 1.368215 |
| hsa-miR-671-5p        | 0.033476 | 1.397388 |
| hsa-miR-6722-3p       | 0.012103 | 1.288777 |
| hsa-miR-718           | 0.016009 | 1.365627 |
| <b>Down-regulated</b> |          |          |
| hsa-let-7a-3p         | 1.07E-04 | 8.70545  |
| hsa-let-7a-5p         | 0.005648 | 2.332647 |
| hsa-let-7b-5p         | 3.94E-04 | 2.588086 |
| hsa-let-7d-5p         | 0.047346 | 1.852211 |
| hsa-let-7e-5p         | 0.048299 | 2.50663  |
| hsa-let-7f-5p         | 0.004928 | 2.336887 |
| hsa-let-7g-5p         | 0.016009 | 2.059855 |
| hsa-miR-1248          | 0.004902 | 5.868749 |
| hsa-miR-125a-5p       | 0.021969 | 2.47606  |
| hsa-miR-152           | 0.026413 | 2.517945 |
| hsa-miR-193a-3p       | 2.31E-04 | 2.850227 |
| hsa-miR-214-5p        | 0.016009 | 6.755226 |
| hsa-miR-219-5p        | 0.016009 | 27.23514 |
| hsa-miR-22-3p         | 0.017375 | 2.013559 |
| hsa-miR-22-5p         | 0.016774 | 5.475135 |
| hsa-miR-26b-5p        | 0.032904 | 3.013432 |
| hsa-miR-27b-3p        | 0.033476 | 1.930875 |

|                 |          |          |
|-----------------|----------|----------|
| hsa-miR-29b-3p  | 0.035898 | 2.955335 |
| hsa-miR-30b-5p  | 0.021969 | 2.979495 |
| hsa-miR-30c-5p  | 0.047346 | 2.238031 |
| hsa-miR-30d-3p  | 0.005653 | 13.89108 |
| hsa-miR-30e-5p  | 0.036069 | 1.78208  |
| hsa-miR-32-5p   | 0.002578 | 8.166767 |
| hsa-miR-326     | 0.002369 | 6.961307 |
| hsa-miR-335-3p  | 0.047346 | 26.41262 |
| hsa-miR-339-5p  | 0.016009 | 4.567096 |
| hsa-miR-33a-5p  | 0.032904 | 4.122062 |
| hsa-miR-340-3p  | 0.019699 | 27.00444 |
| hsa-miR-34a-3p  | 0.002116 | 12.77391 |
| hsa-miR-34c-5p  | 2.31E-04 | 12.46885 |
| hsa-miR-361-5p  | 0.01049  | 1.676426 |
| hsa-miR-365a-3p | 2.31E-04 | 3.368948 |
| hsa-miR-374c-5p | 0.007886 | 6.656583 |
| hsa-miR-378h    | 0.02614  | 5.675561 |
| hsa-miR-3944-5p | 0.041476 | 3.142477 |
| hsa-miR-409-3p  | 0.033168 | 4.38263  |
| hsa-miR-450a-5p | 0.007037 | 8.187235 |
| hsa-miR-491-3p  | 0.010678 | 4.368222 |
| hsa-miR-502-5p  | 0.016774 | 5.166341 |
| hsa-miR-513c-3p | 0.047346 | 3.762527 |
| hsa-miR-5585-5p | 0.016009 | 4.402581 |
| hsa-miR-598     | 0.016774 | 36.40213 |
| hsa-miR-652-3p  | 0.041282 | 1.980695 |
| hsa-miR-744-5p  | 0.012103 | 5.111528 |
| hsa-miR-95      | 0.007886 | 10.01408 |
| hsa-miR-98-5p   | 0.014883 | 2.228227 |
